# Supplementary material for: Systematical Evaluation of Mechanically Strong 3D Printed Diluted magnesium Doping Wollastonite Scaffolds on Osteogenic Capacity in Rabbit Calvarial Defects
Source: PubMed Central journal article supplement (PMC5034319; doi:10.1038/srep34029), 2016-09-23
Supplement: srep34029-s1.pdf [file srep34029-s1.pdf]

**Systematical Evaluation of Mechanically Strong 3D Printed Diluted  
magnesium Doping Wollastonite Scaffolds on Osteogenic capacity in  
Rabbit Calvarial Defects**

Miao Sun<sup>1</sup>, An Liu<sup>2,4</sup>, Huifeng Shao<sup>3,4</sup>, Xianyan Yang<sup>5</sup>, Chiyuan Ma<sup>2</sup>, Shigui Yan<sup>2</sup>,  
Yanming Liu<sup>1,\*</sup>, Yong He<sup>3,4,\*</sup>, Zhongru Gou<sup>5,\*</sup>

<sup>1</sup>*Department of Oral and Maxillofacial Surgery, Second Affiliated Hospital, School of Medicine,  
Zhejiang University, Hangzhou 310009, Zhejiang, China.*

<sup>2</sup>*Department of Orthopaedic Surgery, Second Affiliated Hospital, School of Medicine, Zhejiang  
University, Hangzhou, China.*

<sup>3</sup>*The State Key Lab of Fluid Power Transmission and Control Systems, College of Mechanical  
Engineering, Zhejiang University, Hangzhou 310027, Zhejiang, China.*

<sup>4</sup>*Zhejiang Province's Key Laboratory of 3D Printing Process and Equipment, College of Mechanical  
Engineering, Zhejiang University, Hangzhou 310027, Zhejiang, China.*

<sup>5</sup>*Zhejiang-California International Nanosystems Institute, Zhejiang University, Hangzhou 310029,  
Zhejiang, China.*

Miao Sun, An Liu and Huifeng Shao contributed equally to the work.

\*Correspondence and requests for materials should be addressed to Yanming Liu

(e-mail: [liuyanming@zju.edu.cn](mailto:liuyanming@zju.edu.cn)), Yong He (e-mail: [yongqin@zju.edu.cn](mailto:yongqin@zju.edu.cn)) or to

Zhong-ru Gou (e-mail: [zhrgou@zju.edu.cn](mailto:zhrgou@zju.edu.cn)).

**Supplementary Table S1.** The parameters of primers utilized for detecting osteogenetic gene expression.

| Gene    | Direction | Primer sequence (5' - 3')      |
|---------|-----------|--------------------------------|
| COL1    | Forward   | GCG GTG GTT ACG ACT TTG GTT    |
|         | Reverse   | AGT GAG GAG GGT CTC AAT CTG    |
| OCN     | Forward   | GGC TCA GCC TTC GTG TCC AA     |
|         | Reverse   | CCC TGC CCG TCG ATC AGT T      |
| Osterix | Forward   | GGC ACG AAG AAG CCA TAC TCT GT |
|         | Reverse   | GGG AAA AGG CCG GGT AGT CAT    |
| Runx2   | Forward   | CCC AAG CAT TTC ATC CCT CAC T  |
|         | Reverse   | CAT ACC GAG GGA CAT GCC TGA    |
| GADPH   | Forward   | CCG CCT GGA GAA AGC TGC TAA    |
|         | Reverse   | GAC GAC CTG GTC CTC GGT GTA    |
